# Supplementary material for: G-CSF as a suitable alternative to GM-CSF to boost dinutuximab-mediated neutrophil cytotoxicity in neuroblastoma treatment
Source: HighWire-hosted journal article supplement (doi:10.1136/jitc-2020-002259), 2021-05-01

**Supplementary Table 1 for Figure 1:**

| <b>Cell line</b> | <b>Phenotype</b> | <b>GD2 expression</b> | <b>Remarks</b>                                         |
|------------------|------------------|-----------------------|--------------------------------------------------------|
| NMB              | Adrenergic       | +++                   |                                                        |
| IMR-32           | Adrenergic       | +++                   |                                                        |
| LAN-1            | Adrenergic       | +++                   |                                                        |
| SHEP-2           | Mesenchymal      | +                     | Derived from SK-N-SH cells, isogenic pair with SH-SY5Y |
| SK-N-AS          | Mesenchymal      | ±                     |                                                        |
| SH-SY5Y          | Adrenergic       | -                     | Derived from SK-N-SH cells, isogenic pair with SHEP-2  |
| SK-N-BE          | Adrenergic       | -                     |                                                        |
| 691B             | Adrenergic       | +++                   | Derived from patient 691, bone marrow metastasis (B)   |

## Supplementary Figure 1:

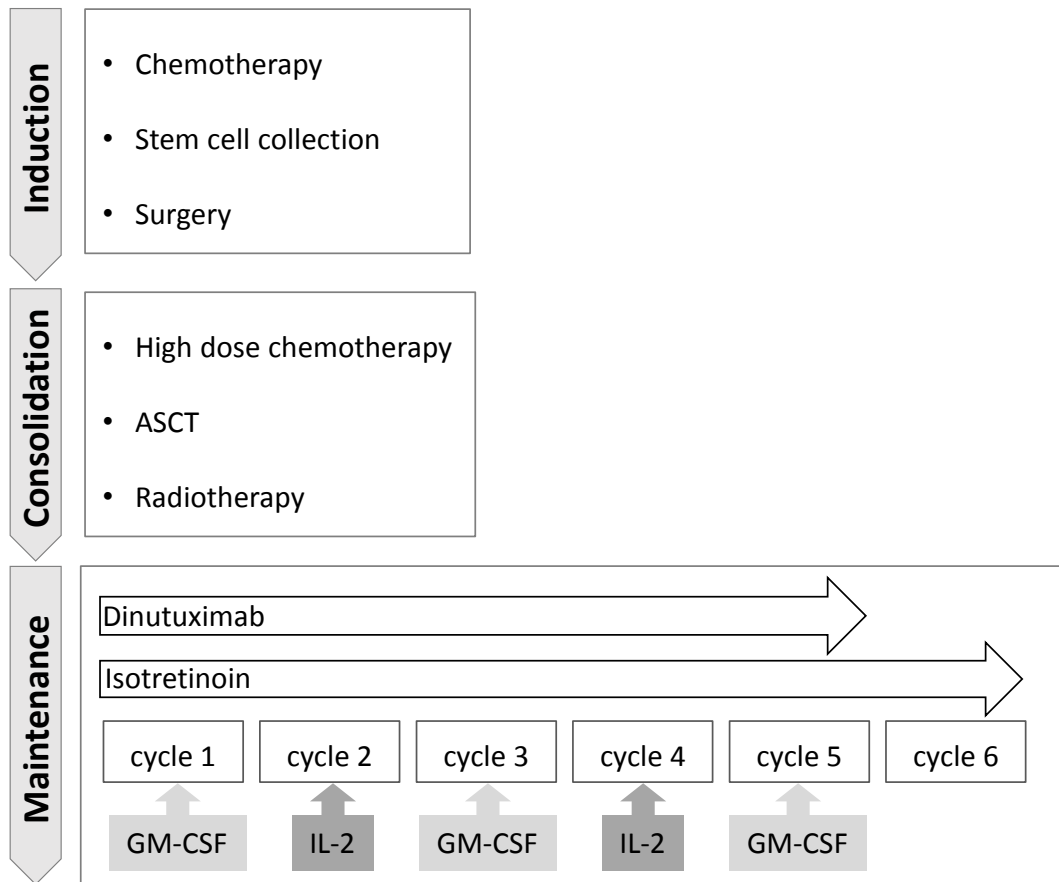

Supplementary Figure 2 for **Figure 1**: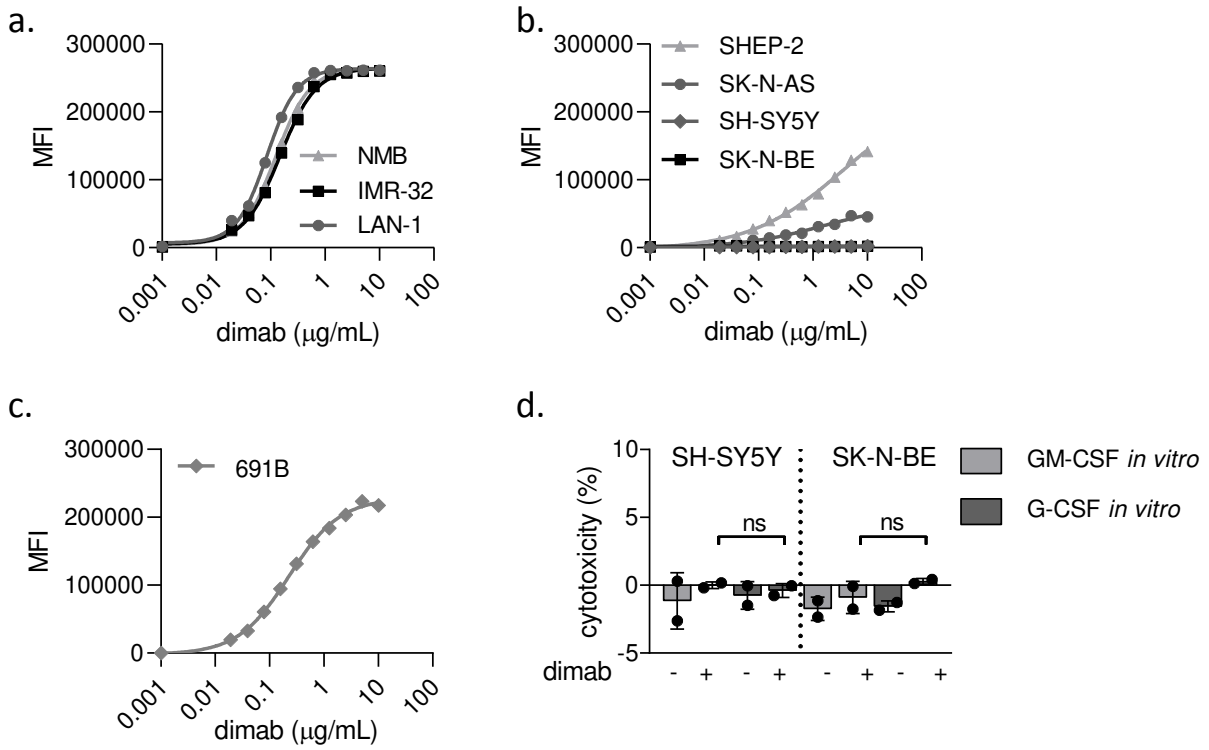

Supplementary Figure 3 for **Figure 1**: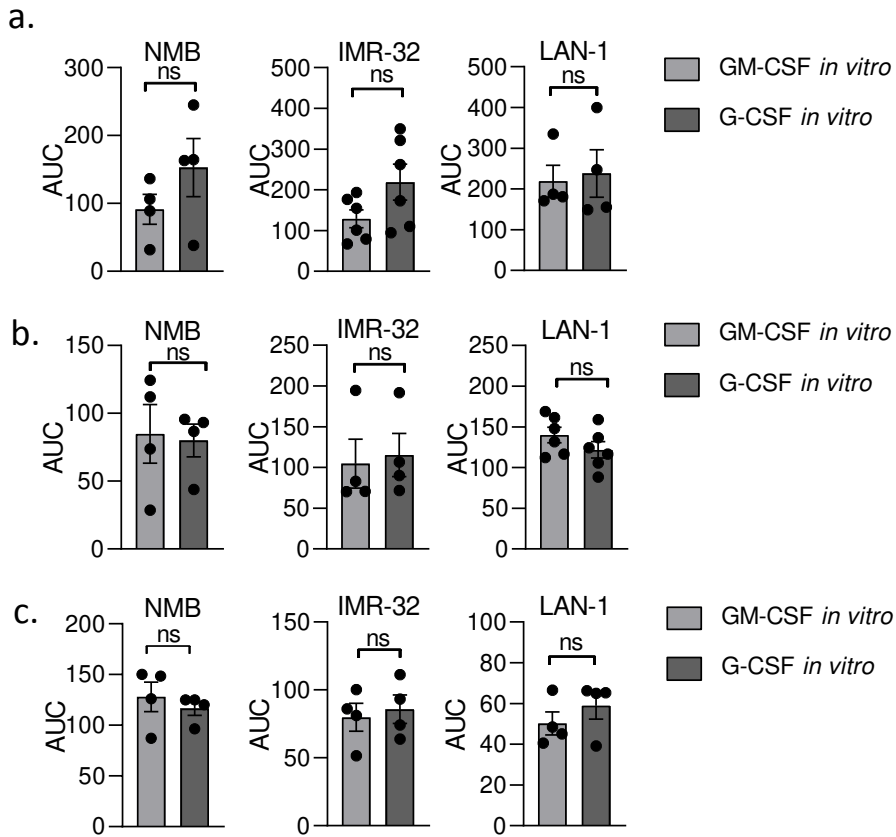

## Supplementary Figure 4 for Figure 4:

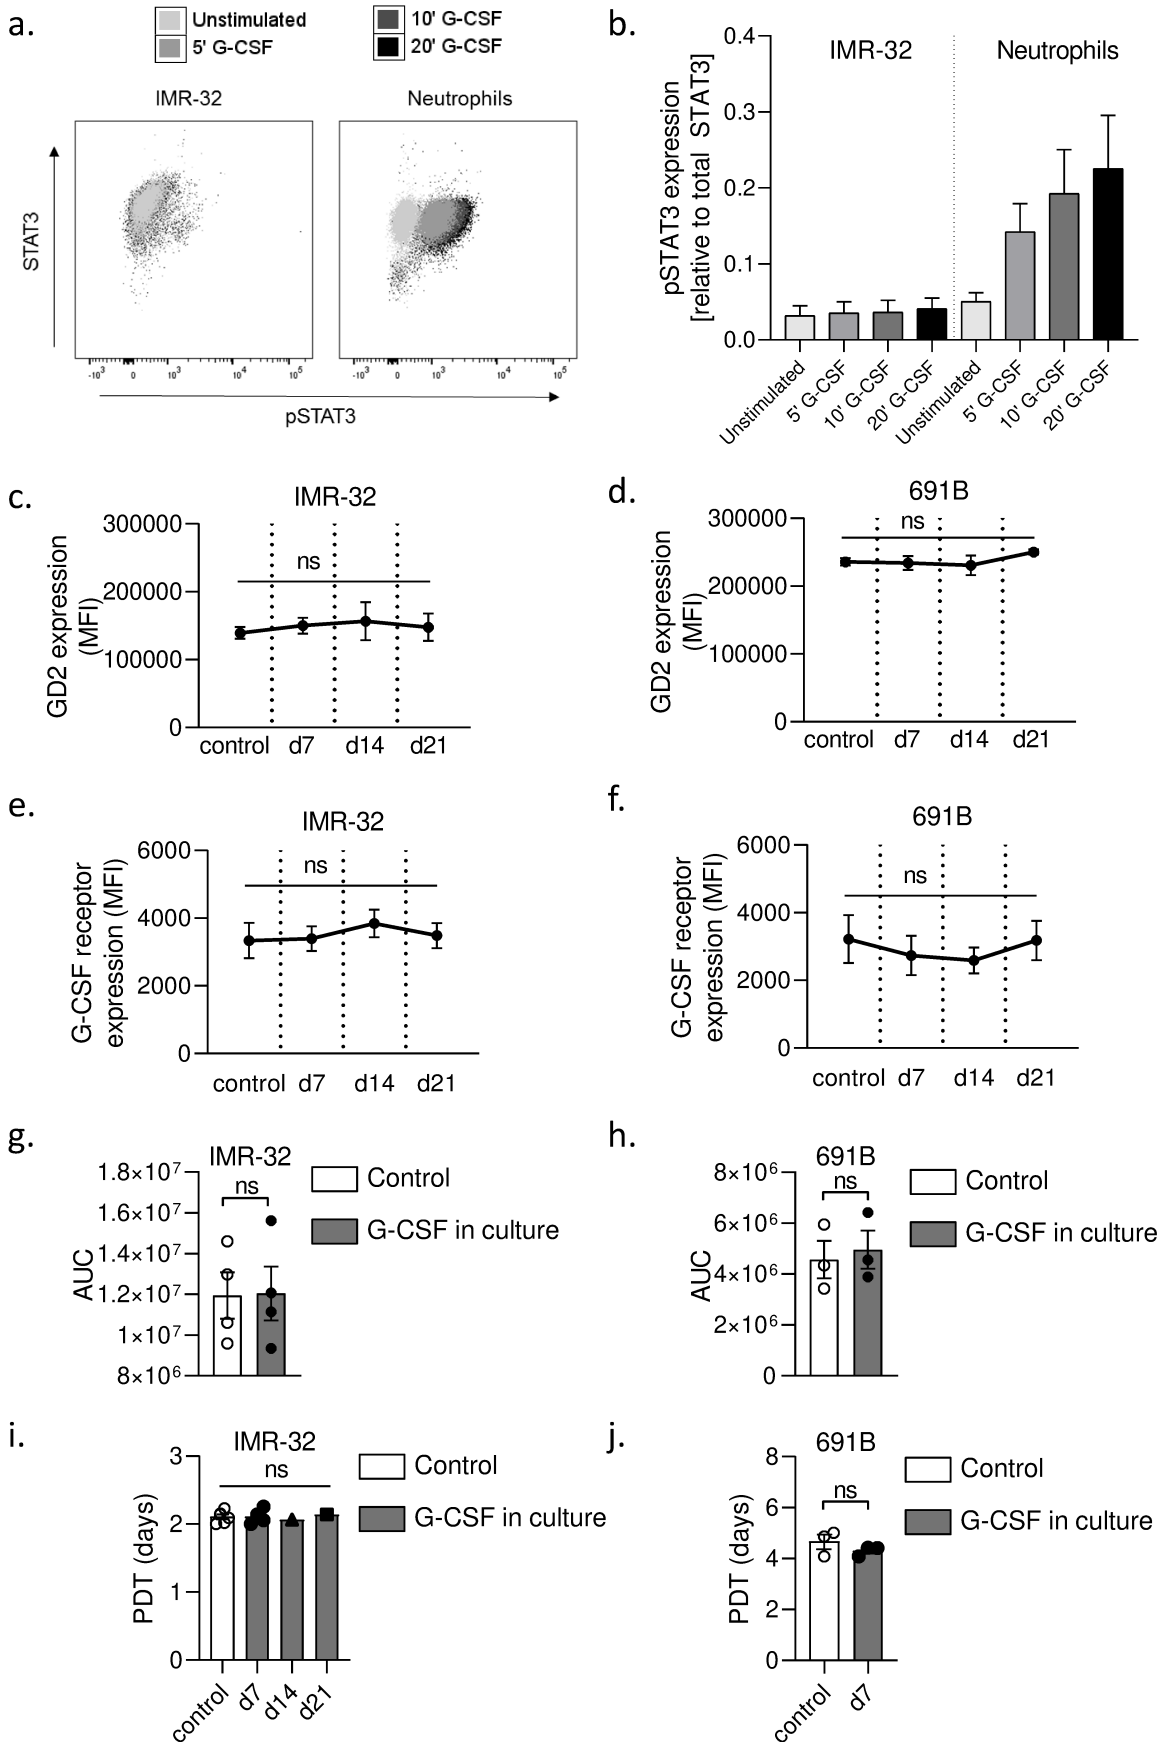

**Supplementary Table 2 for Figure 5:**

| <b>Patient</b> | <b>INRG stage*</b> | <b>Gender</b> | <b>Immunotherapy treatment cycle at time of blood sampling**</b> |
|----------------|--------------------|---------------|------------------------------------------------------------------|
| 1              | High-risk          | Male          | 1                                                                |
| 2              | High-risk          | Male          | 3, 5                                                             |
| 3              | High-risk          | Female        | 5                                                                |
| 4              | High-risk          | Male          | 1, 3                                                             |
| 5              | High-risk          | Male          | 1                                                                |
| 6              | High-risk          | Male          | 1                                                                |

\*INRG= International Neuroblastoma Risk Group

\*\*During cycles 1, 3 and 5 GM-CSF was administered at a dose of 250 µg/m<sup>2</sup>/day for 3 days prior to blood sampling, and before the start of dinutuximab treatment. No samples were obtained during treatment cycles 2 and 4 where patients receive IL-2.

Supplementary Figure 5 for **Figure 5:**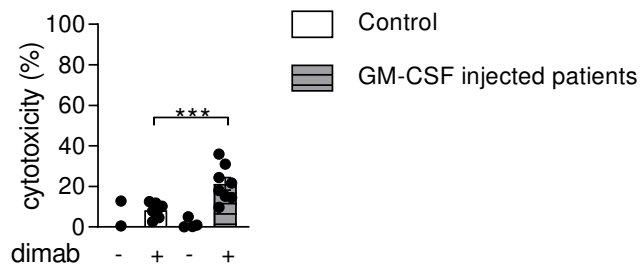

Supplement: jitc-2020-002259supp002_data_supplement.pdf [file jitc-2020-002259supp002_data_supplement.pdf]
