# Supplementary material for: G-CSF as a suitable alternative to GM-CSF to boost dinutuximab-mediated neutrophil cytotoxicity in neuroblastoma treatment
Source: HighWire-hosted journal article supplement (doi:10.1136/jitc-2020-002259), 2021-05-01
Supplement: jitc-2020-002259supp001_data_supplement.pdf [file jitc-2020-002259supp001_data_supplement.pdf]

1 **Supplementary Table 1 for Figure 1. Characterization of neuroblastoma cell lines**

2 Phenotypical characterization of the different neuroblastoma cell lines used in this study, including  
3 phenotype and GD2 expression levels. GD2 surface expression was established by flow cytometry  
4 **(Supplementary Figure 2).**

5

6 **Supplementary Figure 1. Multimodal treatment protocol for high-risk neuroblastoma patients**

7 Scheme showing the different phases (induction, consolidation and maintenance) of the treatment  
8 for high-risk neuroblastoma patients. The immunotherapy regimen, as approved in Northern  
9 America, is subdivided in alternating cycles of dinutuximab combined with GM-CSF or IL-2, and  
10 isotretinoin (13-cis-retinoic acid). Each cycle consists of 28 days. Figure adapted from Smith, V.;  
11 Foster, J. High-Risk Neuroblastoma Treatment Review.<sup>1</sup> ASCT, autologous stem cell transplantation.

12

13 **Supplementary Figure 2 for Figure 1. Binding capacity of dinutuximab to GD2 on neuroblastoma**  
14 **cell lines and ADCC of GD2-negative neuroblastoma cell lines**

15 **(A, B, C)** Binding capacity of increasing concentrations of dinutuximab (dimab) to GD2 (expressed as  
16 MFI) as measured by flow cytometry on GD2-positive cell lines (A) NMB (light grey triangles), IMR-32  
17 (black squares) and LAN-1 (dark grey circles) and on cell lines expressing lower or none GD2 (B)  
18 SHEP-2 (light grey triangles), SK-N-AS (dark grey circles), SH-SY5Y (dark grey diamonds) and SK-N-BE  
19 (black squares), and on the GD2-positive primary patient-derived 691B cell line (light grey diamonds)  
20 (C). NMB, IMR-32 and LAN-1 n=1, of 2 individual experiments. SHEP-1, SK-N-AS, SH-SY5Y and SK-N-BE  
21 n=2, of 2 individual experiments. 691B n=3, of 3 individual experiments. **(D)** ADCC of GD2-negative  
22 cell lines SH-SY5Y and SK-N-BE opsonized with (+) or without (-) dinutuximab (dimab) by *in vitro*  
23 stimulated neutrophils with GM-CSF (light grey bars) or G-CSF (dark grey bars). SH-SY5Y and SK-N-BE  
24 n=2, of 1 individual experiment. Statistical differences were tested with unpaired T-test used to test  
25 statistical differences.

26

27 **Supplementary Figure 3 for Figure 1. Area under the curve for statistics of Figure 1B-D**

28 Areas under the curve (AUC) of ADCCs of NMB, IMR-32 and LAN-1 cells with dinutuximab titration  
29 **(A)**, with increasing T:E ratios **(B)**, or with cytokines titration **(C)**, by neutrophils stimulated *in vitro*  
30 with GM-CSF (light grey bars) or G-CSF (dark grey bars). NMB n=4, IMR-32 n=4-6, LAN-1 n=4-6, of 3  
31 individual experiments. Statistical significance was tested with unpaired T-test to test the difference  
32 of the AUC.

33

34 **Supplementary Figure 4 for Figure 4. Effect of G-CSF treatment on proliferation rate and GD2**  
35 **expression**

36 **(A-B)** Representative flow cytometry plots of intracellular total STAT3 plotted against intracellular  
37 pSTAT3 (A) and pSTAT3 intracellular expression levels relative to total STAT3 in IMR-32 cell line and  
38 neutrophils over the course of G-CSF exposure (0 to 20 minutes). N=2, of 2 individual experiments  
39 **(B)**. **(C)** GD2 expression (expressed as MFI) measured over time on IMR-32 cells cultured in absence  
40 (control) or presence of G-CSF for 7, 14 and 21 days detected with 1 µg/mL of dinutuximab. N=3-13,  
41 of 6 individual experiments. Statistical significances were tested with ordinary one-way ANOVA with  
42 post-hoc Sidak test. **(D)** GD2 expression (expressed as MFI) measured over time on 691B cells  
43 cultured in absence (control) or presence of G-CSF for 7, 14 and 21 days detected with 2.5 µg/mL of  
44 dinutuximab. N=4-14, of 6 individual experiments. Statistical differences were assessed with  
45 ordinary one-way ANOVA with post-hoc Sidak test. **(E-F)** G-CSF receptor expression (expressed as  
46 MFI) measured over time on IMR-32 and 691B cells cultured in absence (control) or presence of G-  
47 CSF for 7, 14 and 21 days. IMR-32 n=2-3, 691B: n= 3-4, of 3 and 4 individual experiments,  
48 respectively. Statistical significance was assessed with ordinary one-way ANOVA with post-hoc Sidak  
49 test. **(G-H)** Area under the curve (AUC) of one-week proliferation rates of IMR-32 cultures (G) and  
50 691B cultures (H) treated without (white bars) or with G-CSF (dark grey bars). IMR-32 n=4, 691B n=3,  
51 of 3 and 4 individual experiments, respectively. Statistical significance was tested with unpaired T-  
52 test to test the difference of the AUC. **(I)** Population doubling time (PDT, expressed in days) of IMR-

53 32 cells upon being cultured in the absence (control, white symbols) or presence of G-CSF for 7  
54 (circles), 14 (triangle) and 21 (squares) days. N=1-6, of 6 individual experiments. Statistical  
55 significances were tested with ordinary one-way ANOVA with post-hoc Sidak test. **(J)** PDT (expressed  
56 in days) of patient-derived 691B cells upon being cultured in the absence (control, white symbols) or  
57 presence of G-CSF for 7 (circles) days. N=3, of 3 individual experiments. Statistical significance was  
58 assessed with paired T-test.

59

60 **Supplementary Table 2 for Figure 5. GM-CSF injected patient characteristics**

61 GM-CSF injected patient characteristics, including disease stage as determined by the INRG, age at  
62 time of blood sampling (months), gender and treatment cycle 1-5.

63

64 **Supplementary Figure 5 for Figure 5. *In vivo* GM-CSF stimulated neutrophils show enhanced *ex***  
65 ***vivo* killing of IMR-32 neuroblastoma cells**

66 ADCC of IMR-32 cells opsonized with (+) or without (-) dinutuximab (dimab) by control neutrophils  
67 from healthy donors (white bars) or by neutrophils from neuroblastoma patients that were injected  
68 with GM-CSF (striped light grey bars). N=10 healthy donors, n=8 patients, of 4 individual  
69 experiments. Statistical differences were tested with ordinary one-way ANOVA with post-hoc Sidak  
70 test.
